# Supplementary material for: Chemical Synthesis and Biological Evaluation of 3-Substituted Estrone/Estradiol Derivatives as 17β-Hydroxysteroid Dehydrogenase Type 1 Inhibitors Acting via a Reverse Orientation of the Natural Substrate Estrone
Source: MDPI journal article supplement (doi:10.3390/molecules28020632), 2023-01-07
Supplement: s1 [file s1]

## *Supplementary Materials*

# **Chemical Synthesis and Biological Evaluation of 3-Substituted Estrone/Estradiol Derivatives as 17 $\beta$ -Hydroxysteroid Dehydrogenase Type 1 Inhibitors Acting via a Reverse Orientation of the Natural Substrate Estrone**

Adrien Djiemeny Ngueta <sup>1,2</sup>, Jenny Roy <sup>1</sup>, René Maltais <sup>1</sup> and Donald Poirier <sup>1,2,\*</sup>

<sup>1</sup> Laboratory of Medicinal Chemistry, Endocrinology and Nephrology Unit, CHU de Québec Research Center—Université Laval, Québec, QC G1V 4G2, Canada; adrien.ngueta-djiemeny.1@ulaval.ca (A.D.N.); jenny.roy@crchudequebec.ulaval.ca (J.R.); rene.maltais@crchudequebec.ulaval.ca (R.M.)

<sup>2</sup> Department of Molecular Medicine, Faculty of Medicine, Université Laval, Québec, QC G1V 0A6, Canada

\* Correspondence: donald.poirier@crchudequebec.ulaval.ca

### **Table of contents:**

|                                            |
|--------------------------------------------|
| <sup>1</sup> H NMR spectra of compound 5   |
| <sup>13</sup> C NMR spectra of compound 5  |
| HRMS spectra of compound 5                 |
| HPLC chromatogram of compound 5            |
| <sup>1</sup> H NMR spectra of compound 6   |
| <sup>13</sup> C NMR spectra of compound 6  |
| HRMS spectra of compound 6                 |
| HPLC chromatograms of compound 6           |
| <sup>1</sup> H NMR spectra of compound 10  |
| <sup>13</sup> C NMR spectra of compound 10 |
| HRMS spectra of compound 10                |
| HPLC chromatograms of compound 10          |

Compound 5

$^1\text{H}$  NMR spectra of compound 5

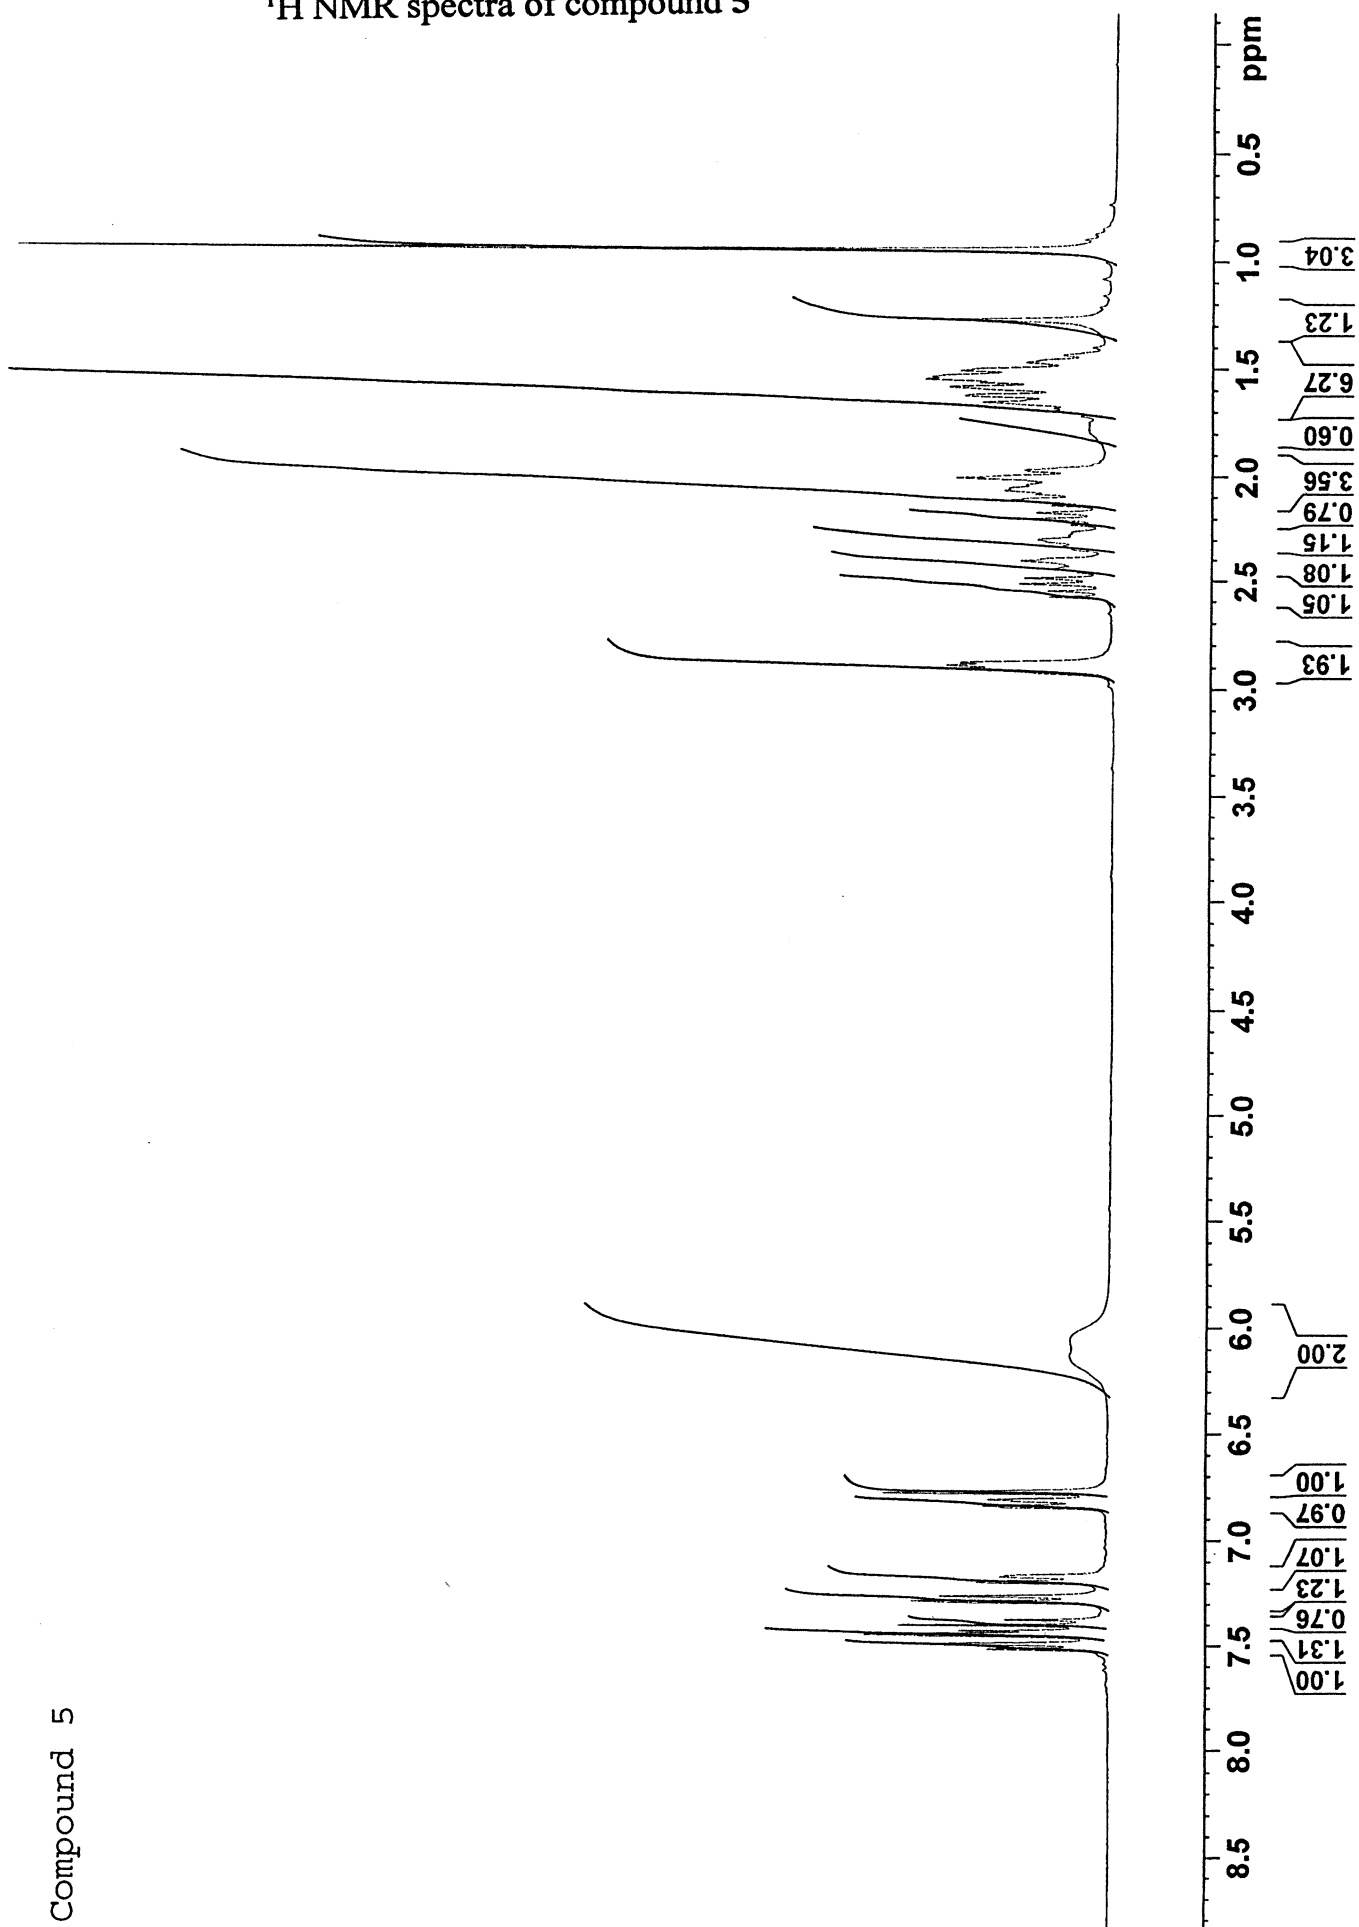

<sup>13</sup>C NMR spectra of compound 5

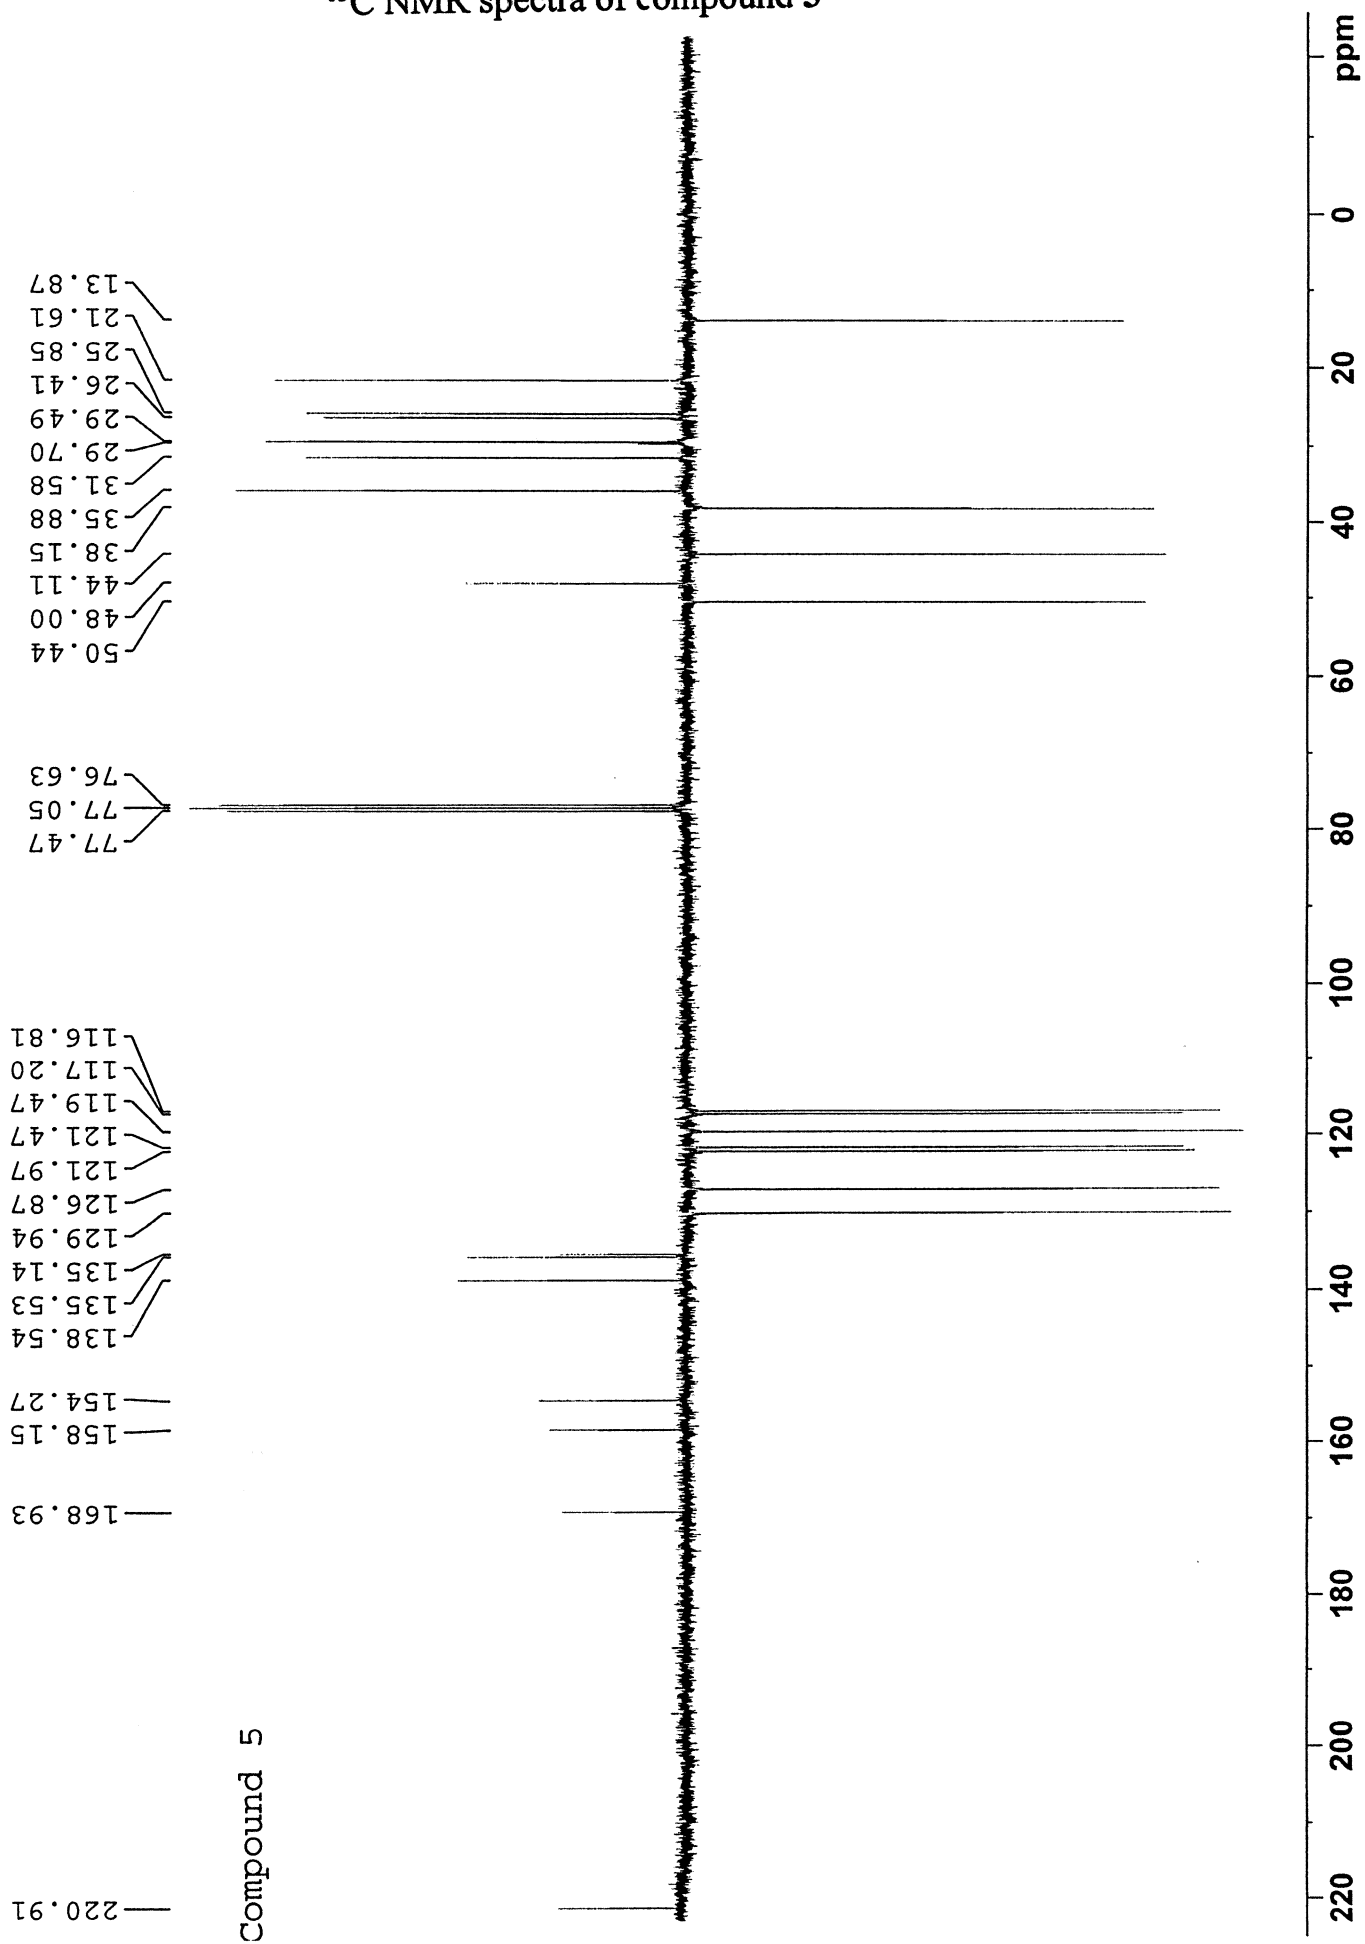

Compound 5

# Qualitative Compound Report

|                        |                        |                               |              |
|------------------------|------------------------|-------------------------------|--------------|
| <b>Data File</b>       | NGAD-593-144.d         | <b>Sample Name</b>            | NGAD-593-144 |
| <b>Sample Type</b>     | Sample                 | <b>Position</b>               | Vial 66      |
| <b>Instrument Name</b> | Instrument 1           | <b>User Name</b>              | Pierre Audet |
| <b>Acq Method</b>      | Direct_Injection_ESI.m | <b>IRM Calibration Status</b> |              |
| <b>DA Method</b>       | MFC.m                  | <b>Comment</b>                |              |

## Compound Table

| Compound Label      | RT    | Mass     | Abund | Formula      | Tgt Mass | Diff (ppm) |
|---------------------|-------|----------|-------|--------------|----------|------------|
| Cpd 1: C25 H27 N O3 | 0.258 | 389.2004 | 2725  | C25 H27 N O3 | 389.1991 | 3.28       |

| Compound Label      | RT    | Algorithm       | Mass     |
|---------------------|-------|-----------------|----------|
| Cpd 1: C25 H27 N O3 | 0.258 | Find By Formula | 389.2004 |

## MS Spectrum

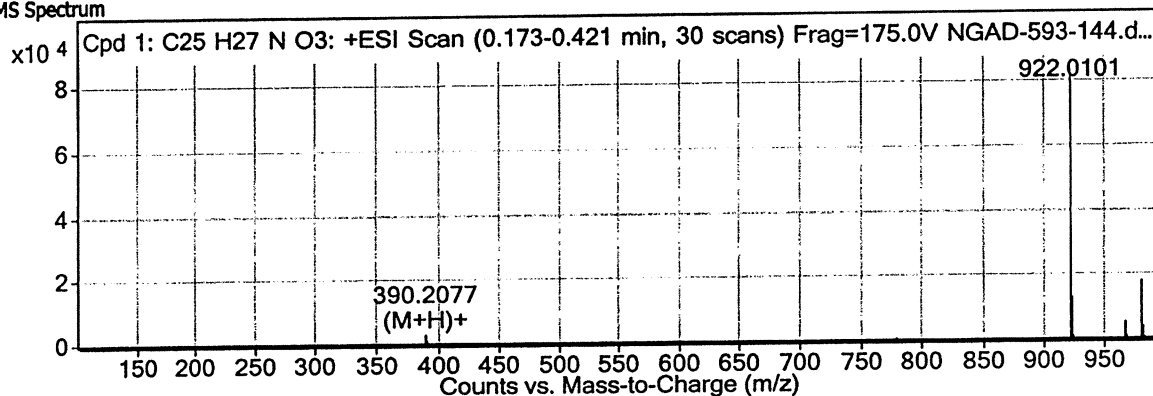

## MS Zoomed Spectrum

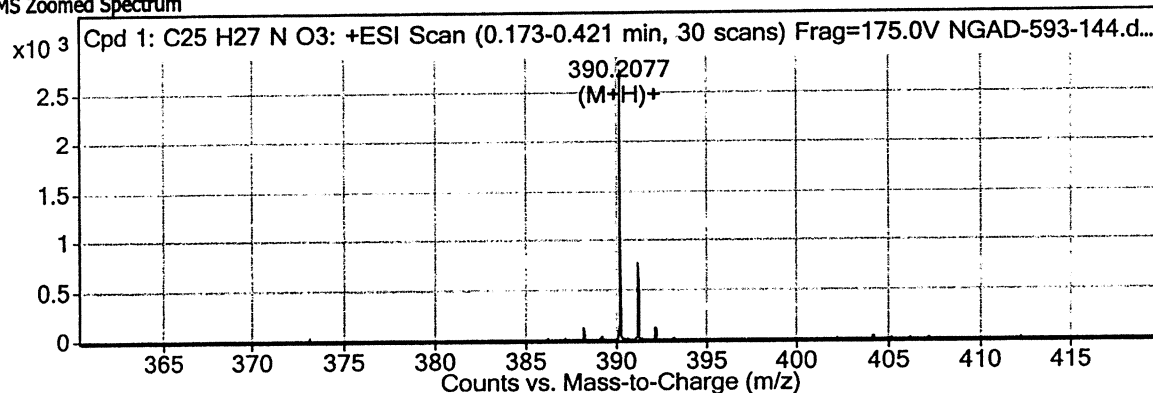

## MS Spectrum Peak List

| m/z      | Calc m/z | Diff(ppm) | z | Abund | Formula      | Ion    |
|----------|----------|-----------|---|-------|--------------|--------|
| 390.2077 | 390.2064 | 3.28      | 1 | 2745  | C25 H28 N O3 | (M+H)+ |
| 391.2107 | 391.2097 | 2.72      | 1 | 777   | C25 H28 N O3 | (M+H)+ |
| 922.0101 |          |           |   | 84640 |              |        |
| 922.3857 |          |           |   | 2036  |              |        |
| 922.5534 |          |           |   | 236   |              |        |
| 922.7682 |          |           |   | 207   |              |        |
| 923.0134 |          |           |   | 12778 |              |        |
| 923.3925 |          |           |   | 281   |              |        |
| 924.0163 |          |           |   | 1612  |              |        |

## HPLC chromatogram of compound 5

## ==== Shimadzu LabSolutions Analysis Report =====

C:\LabSolutions\Data\Project1\EQUIPE DONALD POIRIER\Adrien NGAD\NGAD-593-146.lcd

Acquired by : System Administrator

Sample Name : NGAD-593-144

Sample ID : NGAD-593-144

Tray# : 1

Vial# : 2

Injection Volume : 8

Data File : C:\LabSolutions\Data\Project1\EQUIPE DONALD POIRIER\Adrien NGAD\NG

Method File : C:\LabSolutions\Data\Project1\EQUIPE DONALD POIRIER\Rene Maltais met

Report Format File : C:\LabSolutions\Data\Project1\EQUIPE DONALD POIRIER\Rene Maltais (div

Month-Day Acquired : 1/17/2022

Month-Day Processed : 1/17/2022

## &lt;Chromatogram&gt;

C:\LabSolutions\Data\Project1\EQUIPE DONALD POIRIER\Adrien NGAD\NGAD-593-146.lcd  
AU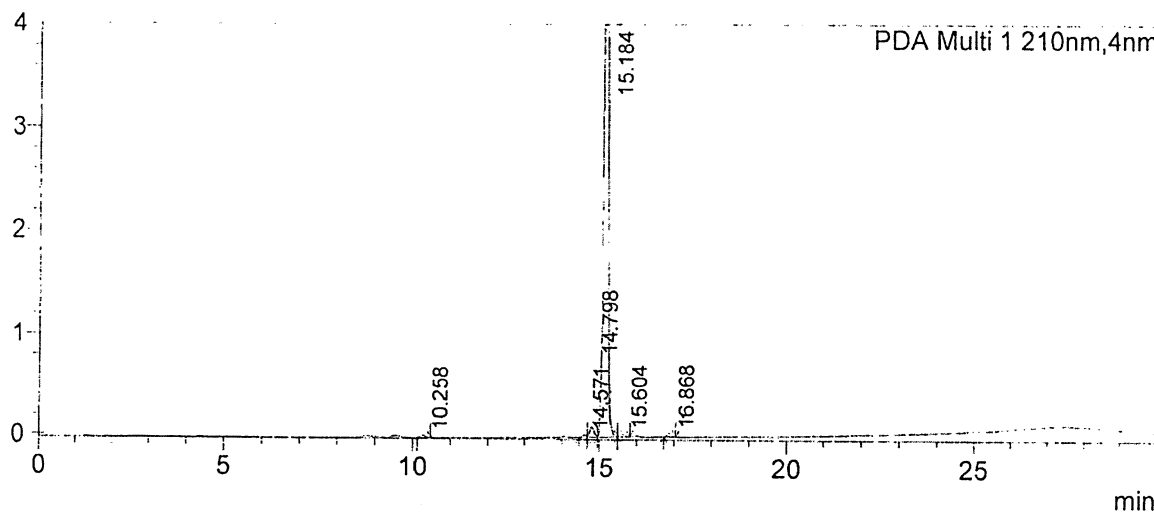

Peak Table

PDA Ch1 210nm

| Peak# | Ret. Time | Area     | Area%   |
|-------|-----------|----------|---------|
| 1     | 10.258    | 172237   | 0.412   |
| 2     | 14.571    | 147548   | 0.353   |
| 3     | 14.798    | 771792   | 1.846   |
| 4     | 15.184    | 40252185 | 96.284  |
| 5     | 15.604    | 241965   | 0.579   |
| 6     | 16.868    | 219818   | 0.526   |
| Total |           | 41805544 | 100.000 |

Compound 6

$^1\text{H}$  NMR spectra of compound 6

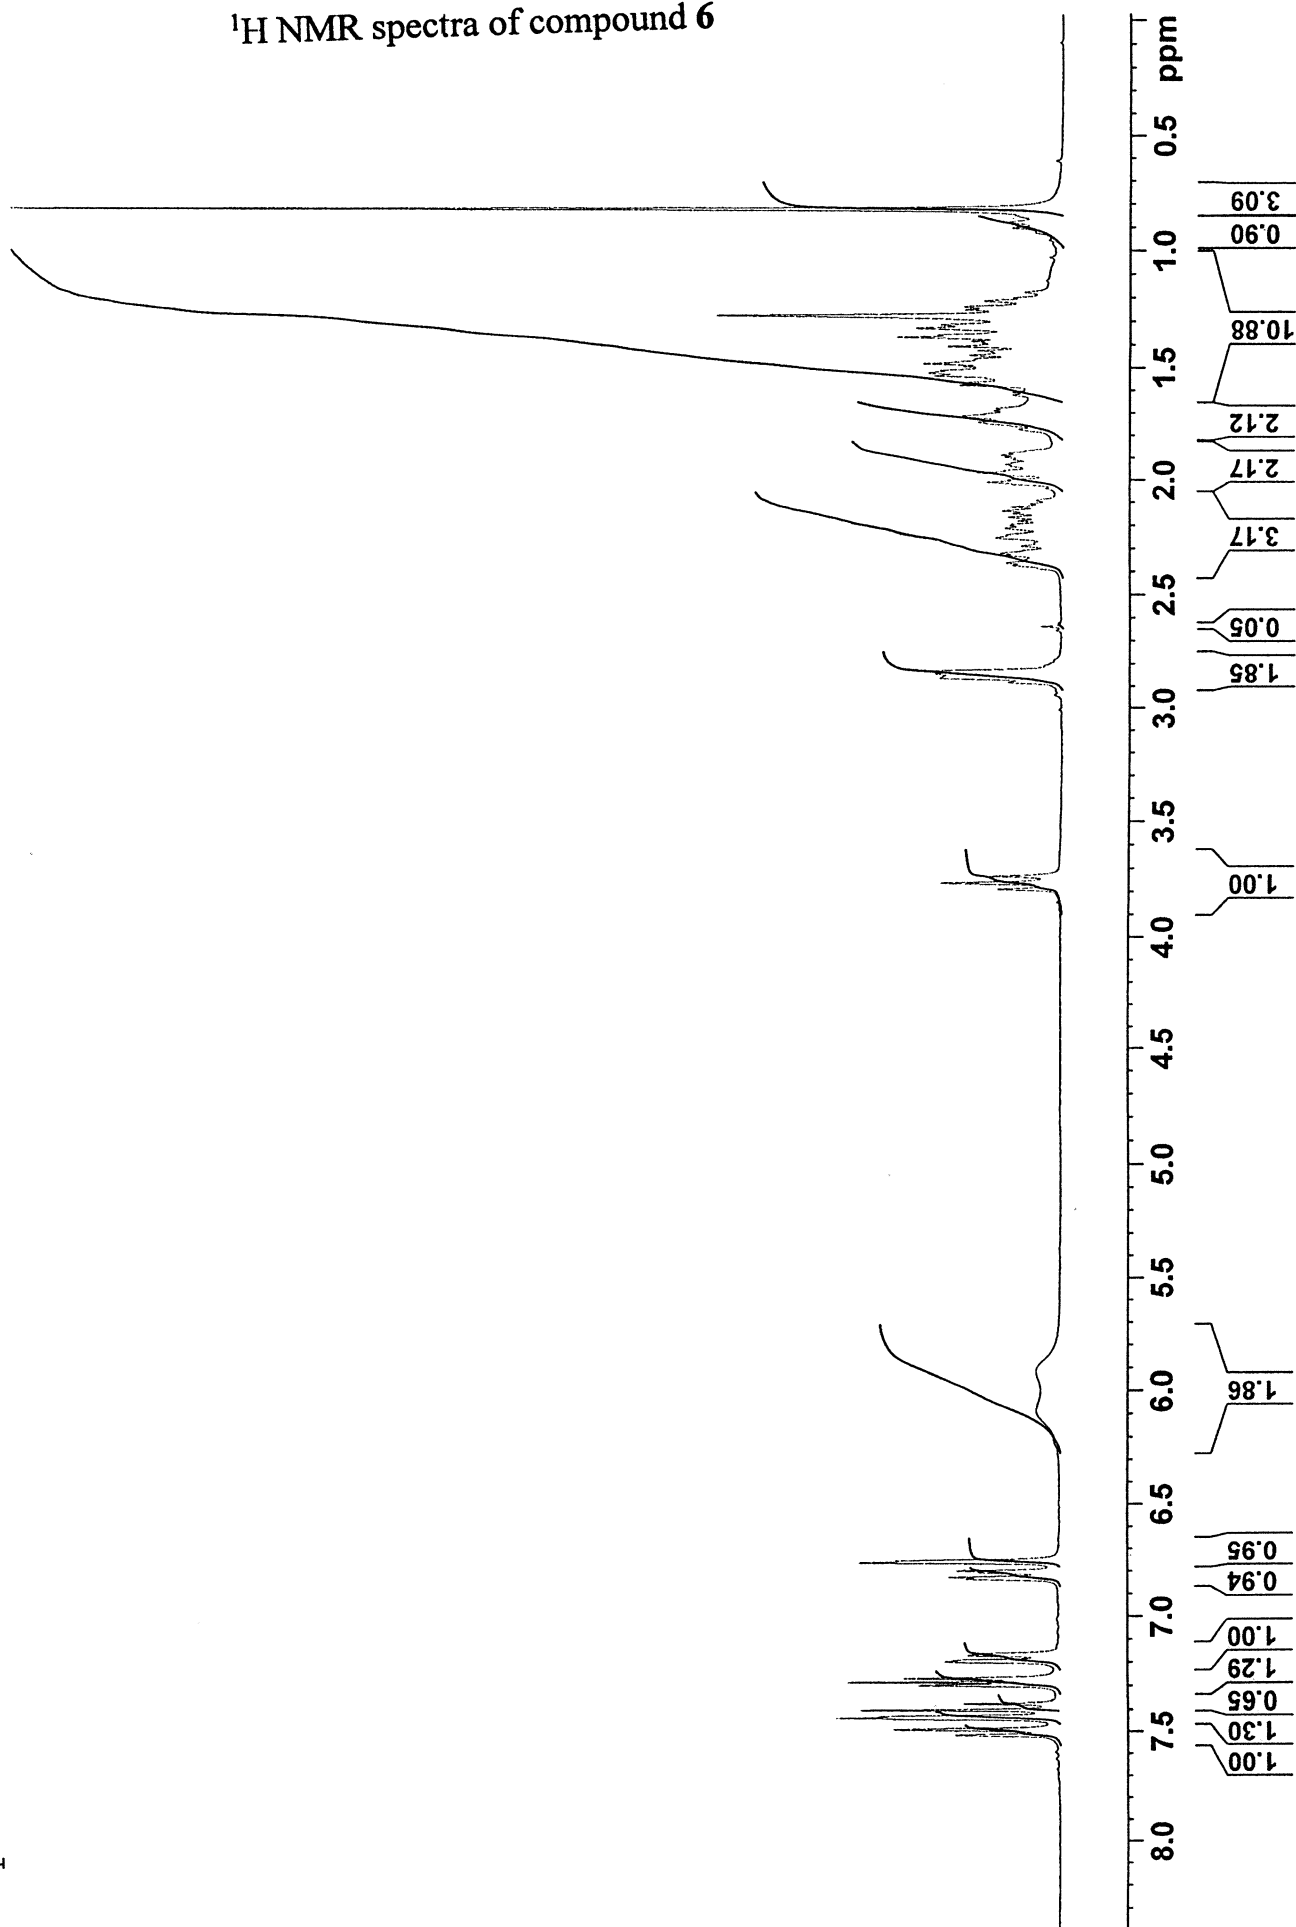

<sup>13</sup>C NMR spectra of compound 6

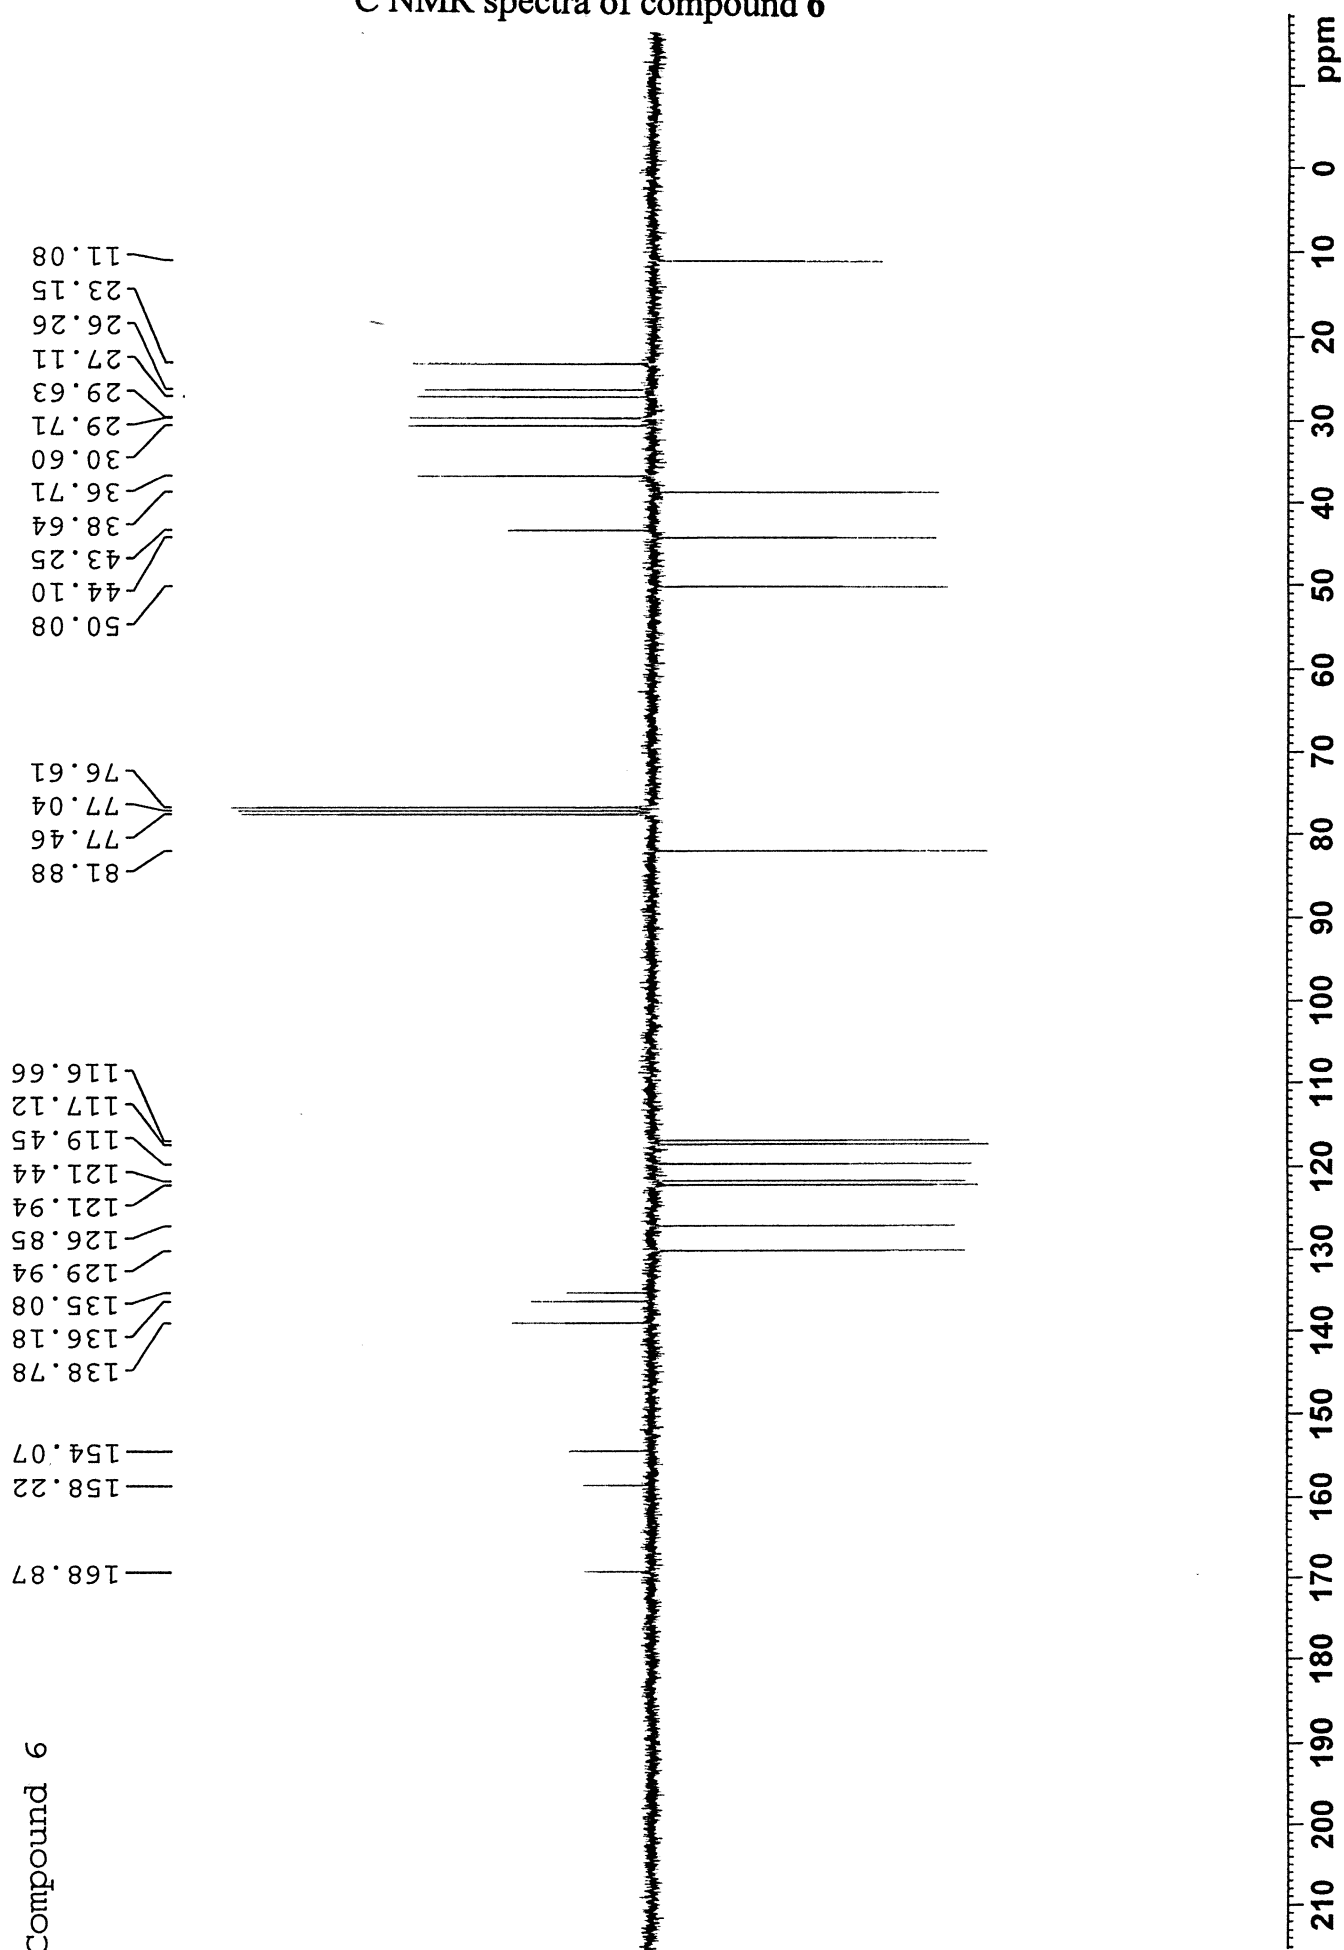

Compound 6

## Qualitative Compound Report

|                 |                        |                        |              |
|-----------------|------------------------|------------------------|--------------|
| Data File       | NGAD-593-142.d         | Sample Name            | NGAD-593-142 |
| Sample Type     | Sample                 | Position               | Vial 65      |
| Instrument Name | Instrument 1           | User Name              | Pierre Audet |
| Acq Method      | Direct_Injection_ESI.m | IRM Calibration Status | [REDACTED]   |
| DA Method       | MFC.m                  | Comment                |              |

### Compound Table

| Compound Label      | RT    | Mass     | Abund | Formula      | Tgt Mass | Diff (ppm) |
|---------------------|-------|----------|-------|--------------|----------|------------|
| Cpd 1: C25 H29 N O3 | 0.248 | 391.2157 | 4647  | C25 H29 N O3 | 391.2147 | 2.32       |

| Compound Label      | RT    | Algorithm       | Mass     |
|---------------------|-------|-----------------|----------|
| Cpd 1: C25 H29 N O3 | 0.248 | Find By Formula | 391.2157 |

### MS Spectrum

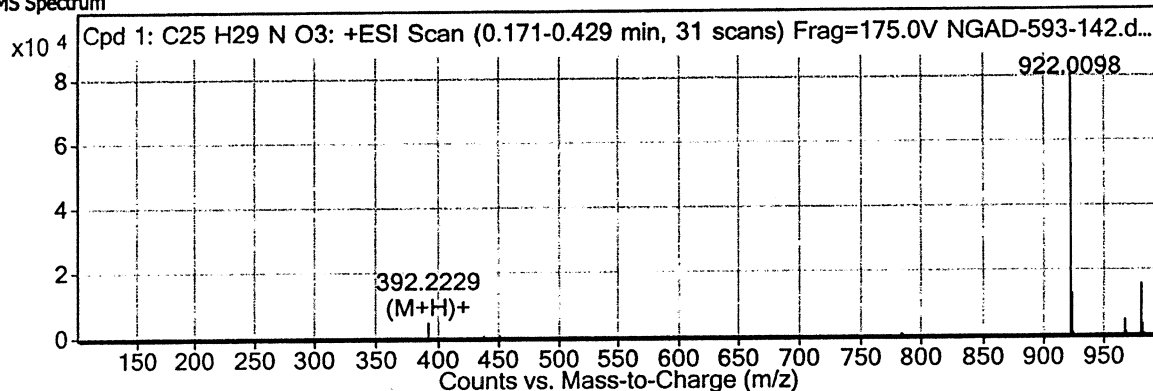

### MS Zoomed Spectrum

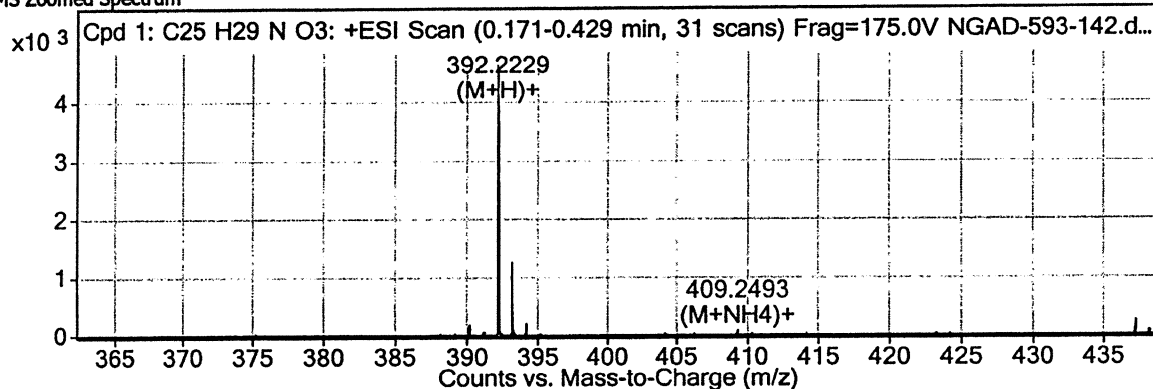

### MS Spectrum Peak List

| m/z      | Calc m/z | Diff(ppm) | z | Abund | Formula       | Ion      |
|----------|----------|-----------|---|-------|---------------|----------|
| 392.2229 | 392.222  | 2.32      | 1 | 4687  | C25 H30 N O3  | (M+H)+   |
| 393.2262 | 393.2253 | 2.29      | 1 | 1260  | C25 H30 N O3  | (M+H)+   |
| 409.2493 | 409.2486 | 1.9       | 1 | 85    | C25 H33 N2 O3 | (M+NH4)+ |
| 922.0098 |          |           |   | 84125 |               |          |
| 922.3853 |          |           |   | 2018  |               |          |
| 922.5563 |          |           |   | 225   |               |          |
| 923.013  |          |           |   | 12761 |               |          |
| 923.3918 |          |           |   | 274   |               |          |
| 924.0156 |          |           |   | 1570  |               |          |



## HPLC chromatograms of compound 6

## ==== Shimadzu LabSolutions Analysis Report ====

C:\LabSolutions\Data\Project1\EQUIPE DONALD POIRIER\Adrien NGAD\NGAD-593-143.lcd

Acquired by : System Administrator

Sample Name : NGAD-593-142

Sample ID : NGAD-593-142

Tray# : 1

Vial# : 1

Injection Volume : 8

Data File : C:\LabSolutions\Data\Project1\EQUIPE DONALD POIRIER\Adrien NGAD\NG

Method File : C:\LabSolutions\Data\Project1\EQUIPE DONALD POIRIER\Rene Maltais met

Report Format File : C:\LabSolutions\Data\Project1\EQUIPE DONALD POIRIER\Rene Maltais (div

Month-Day Acquired : 1/17/2022

Month-Day Processed : 1/17/2022

## &lt;Chromatogram&gt;

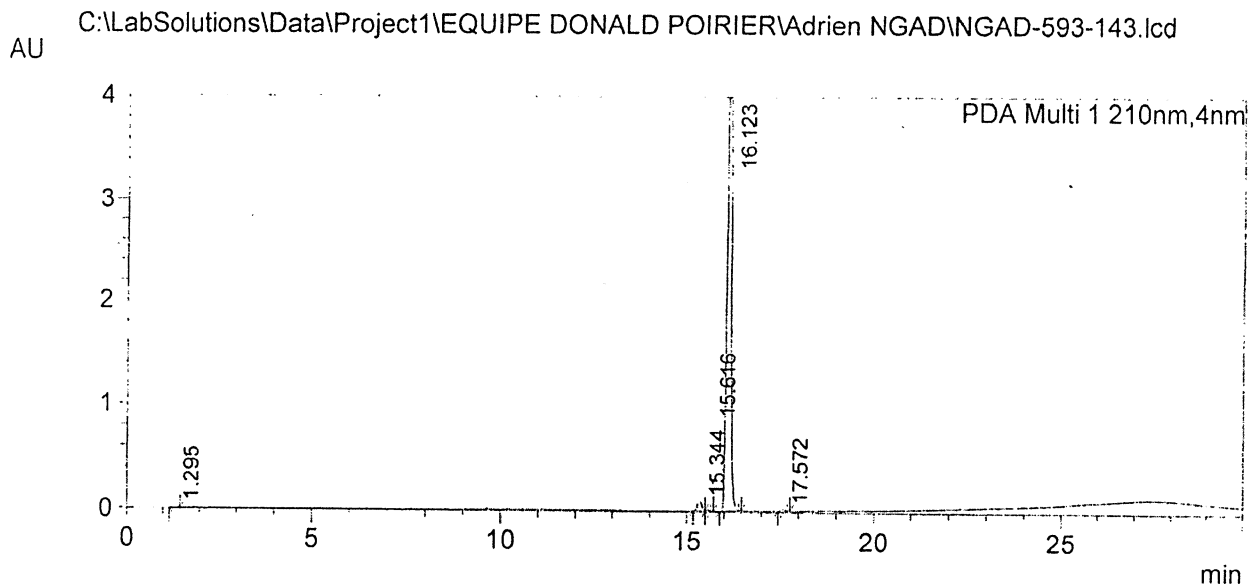

Peak Table

PDA Ch1 210nm

| Peak# | Ret. Time | Area     | Area%   |
|-------|-----------|----------|---------|
| 1     | 1.295     | 169349   | 0.470   |
| 2     | 15.344    | 650595   | 1.808   |
| 3     | 15.616    | 76874    | 0.214   |
| 4     | 16.123    | 34956940 | 97.119  |
| 5     | 17.572    | 140141   | 0.389   |
| Total |           | 35993900 | 100.000 |

NGAD-593-178+179  
CDCl3  
13 janvier 2022  
1H NMR

$^1\text{H}$  NMR spectra of compound 10

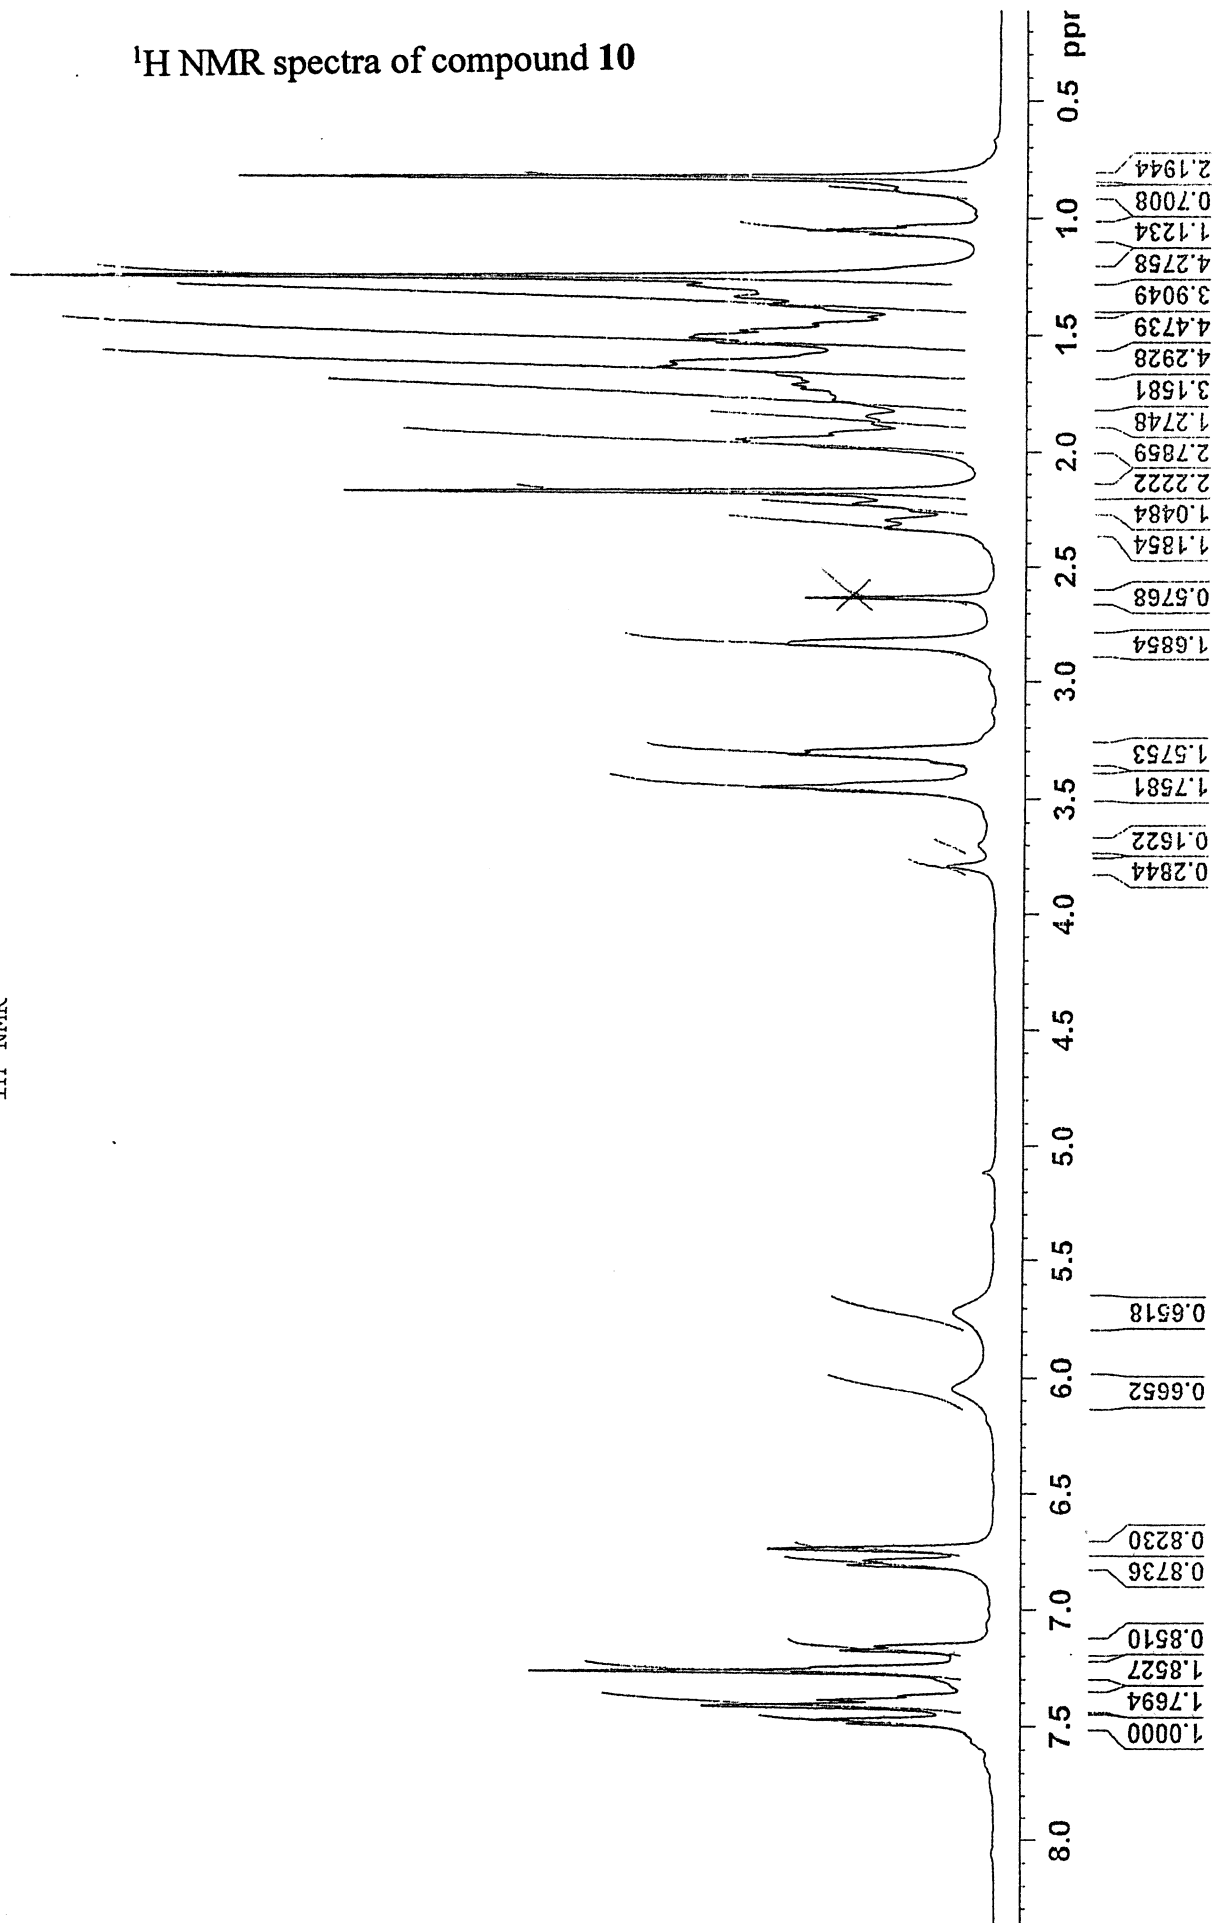

<sup>13</sup>C NMR spectra of compound 10

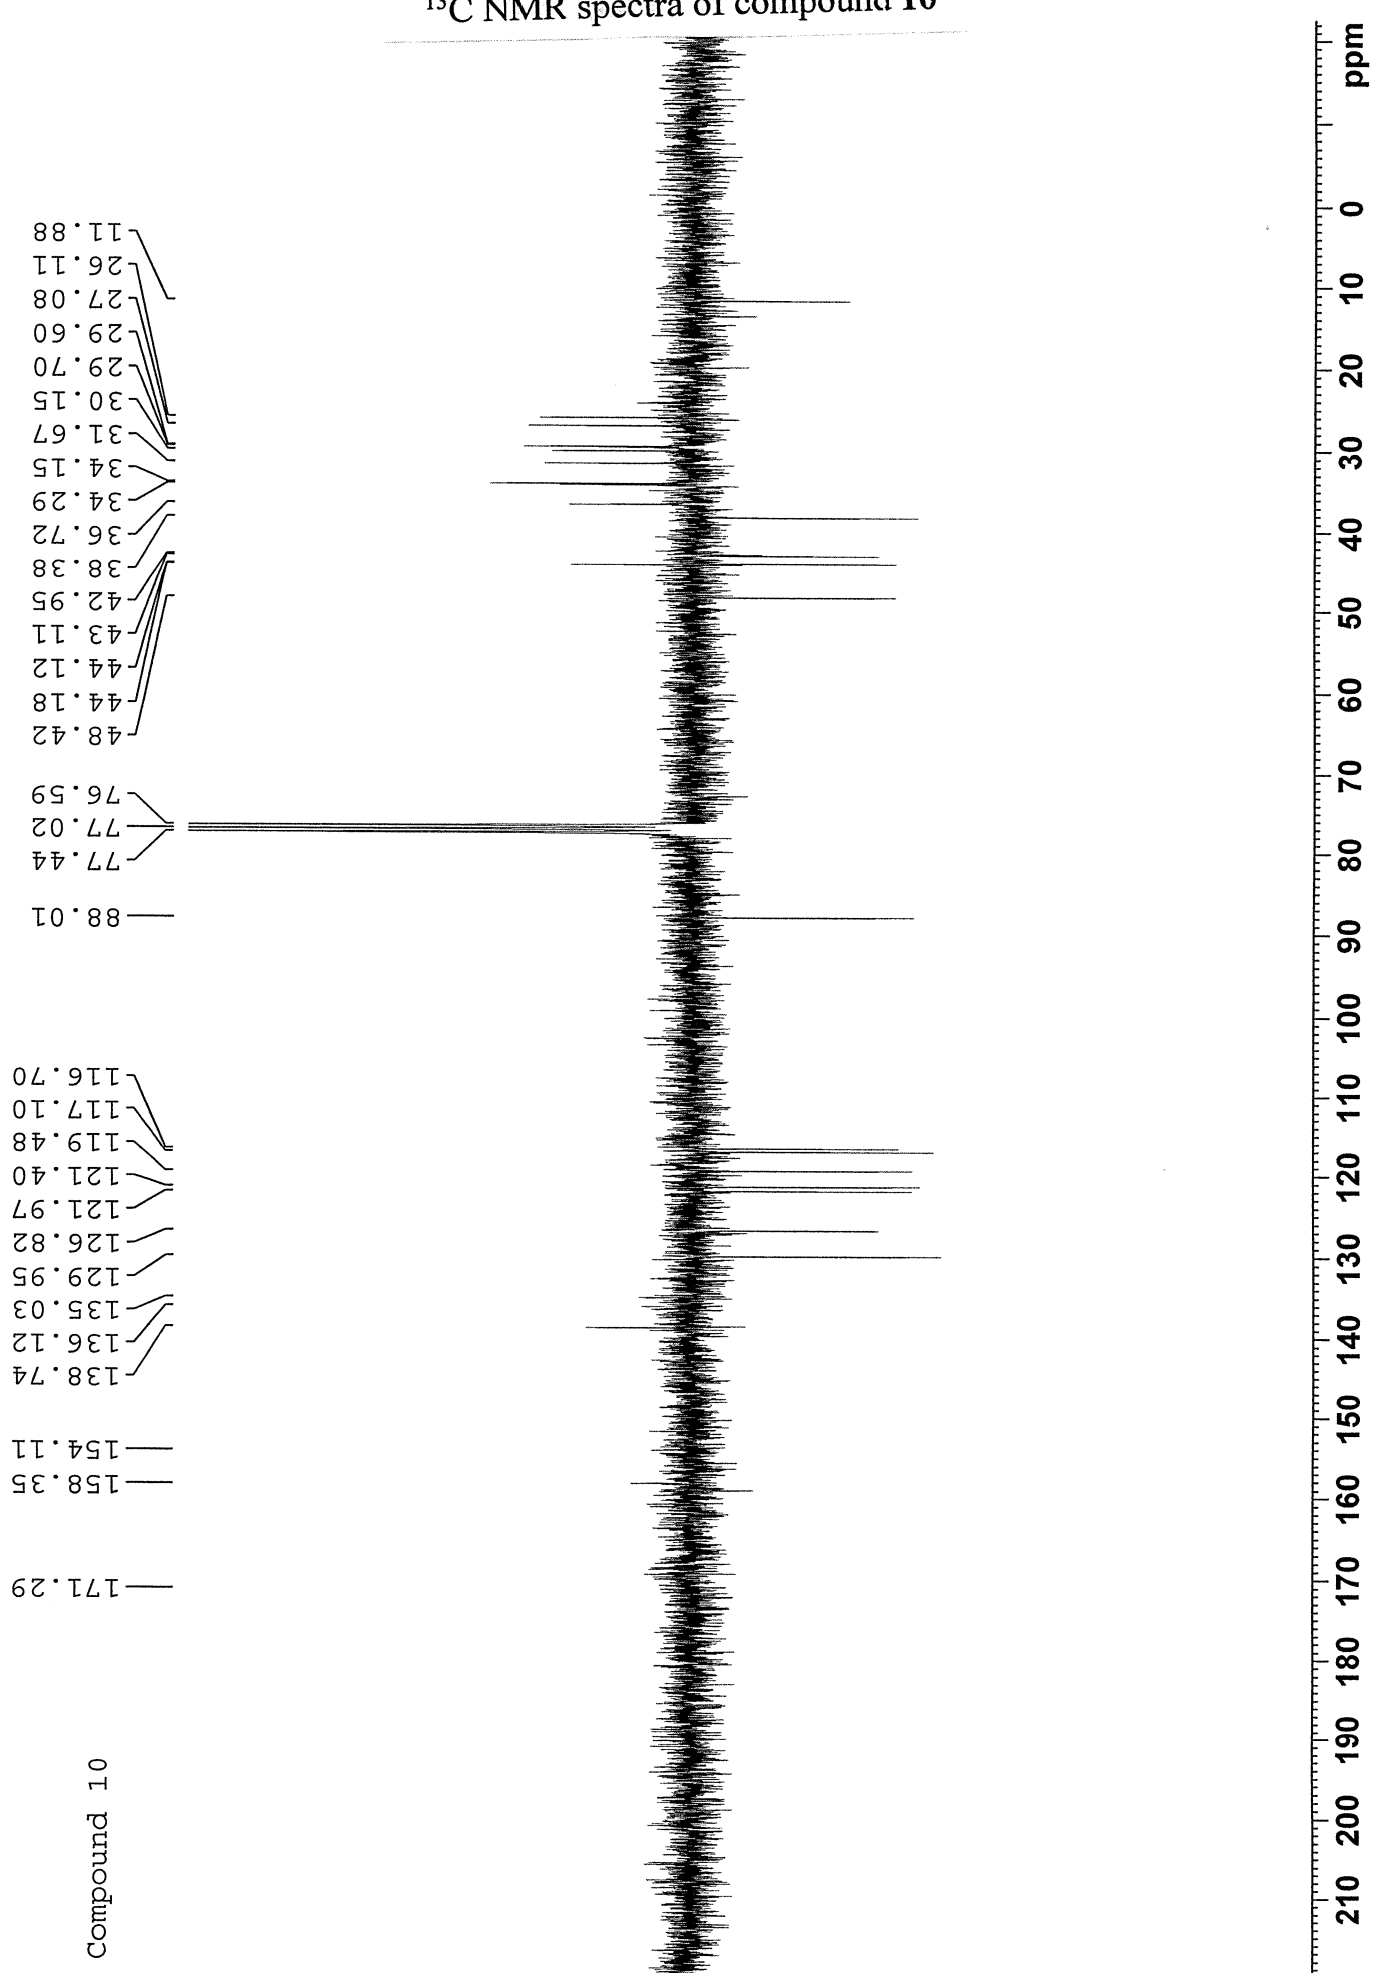

Compound 10

# Qualitative Compound Report

|                        |                        |                               |                   |
|------------------------|------------------------|-------------------------------|-------------------|
| <b>Data File</b>       | NGAD-593-178.d         | <b>Sample Name</b>            | NGAD-593-178      |
| <b>Sample Type</b>     | Sample                 | <b>Position</b>               | Vial 11           |
| <b>Instrument Name</b> | Instrument 1           | <b>User Name</b>              | Olivier Thibeault |
| <b>Acq Method</b>      | Direct_Injection_ESI.m | <b>IRM Calibration Status</b> |                   |
| <b>DA Method</b>       | MFC.m                  | <b>Comment</b>                |                   |

## Compound Table

| Compound Label         | RT    | Mass     | Abund | Formula         | Tgt Mass | Diff (ppm) |
|------------------------|-------|----------|-------|-----------------|----------|------------|
| Cpd 2: C28 H34 Br N O3 | 0.234 | 511.1712 | 11533 | C28 H34 Br N O3 | 511.1722 | -2.03      |

| Compound Label         | RT    | Algorithm       | Mass     |
|------------------------|-------|-----------------|----------|
| Cpd 2: C28 H34 Br N O3 | 0.234 | Find By Formula | 511.1712 |

## MS Spectrum

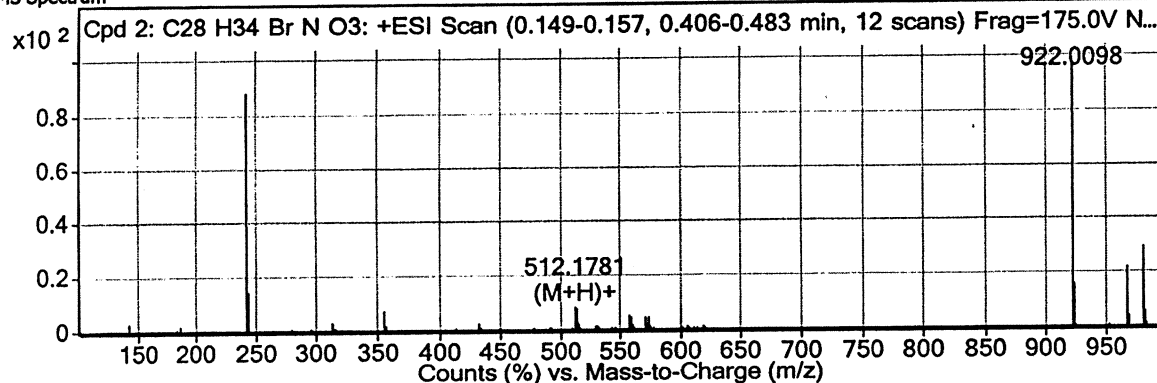

## MS Zoomed Spectrum

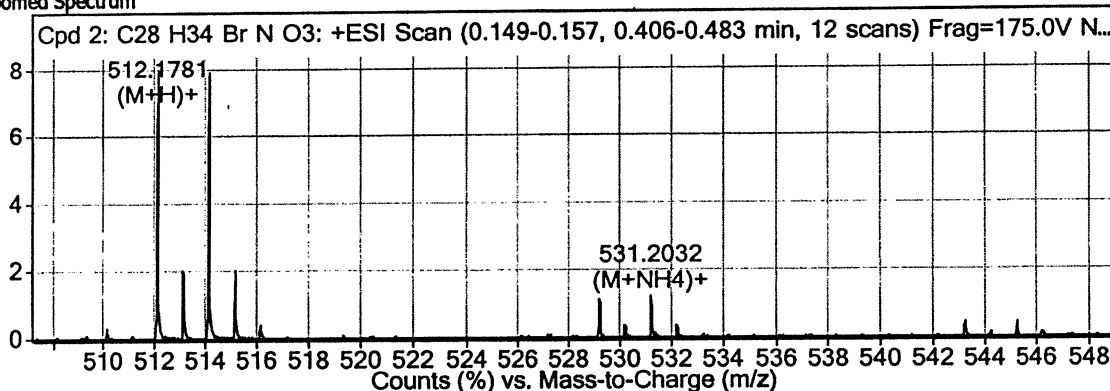

## MS Spectrum Peak List

| m/z      | Calc m/z | Diff(ppm) | z | Abund  | Formula          | Ion      |
|----------|----------|-----------|---|--------|------------------|----------|
| 512.1781 | 512.1795 | -2.74     | 1 | 11864  | C28 H35 Br N O3  | (M+H)+   |
| 513.182  | 513.1828 | -1.59     | 1 | 3219   | C28 H35 Br N O3  | (M+H)+   |
| 514.1772 | 514.1779 | -1.29     | 1 | 11626  | C28 H35 Br N O3  | (M+H)+   |
| 515.1802 | 515.1809 | -1.4      | 1 | 3151   | C28 H35 Br N O3  | (M+H)+   |
| 529.2045 | 529.206  | -2.85     | 1 | 1732   | C28 H38 Br N2 O3 | (M+NH4)+ |
| 531.2032 | 531.2044 | -2.33     | 1 | 1792   | C28 H38 Br N2 O3 | (M+NH4)+ |
| 922.0098 |          |           |   | 146258 |                  |          |
| 922.392  |          |           |   | 5962   |                  |          |

## ==== Shimadzu LabSolutions Analysis Report ====

C:\LabSolutions\Data\Project1\EQUIPE DONALD POIRIER\Adrien NGAD\NGAD-593-179.lcd  
Acquired by : System Administrator  
Sample Name : NGAD-593-178  
Sample ID : NGAD-593-178  
Tray# : 1  
Vial# : 3  
Injection Volume : 8  
Data File : C:\LabSolutions\Data\Project1\EQUIPE DONALD POIRIER\Adrien NGAD\NGAD-593-179.lcd  
Method File : C:\LabSolutions\Data\Project1\EQUIPE DONALD POIRIER\Rene Maltais met  
Report Format File : C:\LabSolutions\Data\Project1\EQUIPE DONALD POIRIER\Rene Maltais (div)  
Month-Day Acquired : 1/17/2022  
Month-Day Processed : 1/17/2022

## &lt;Chromatogram&gt;

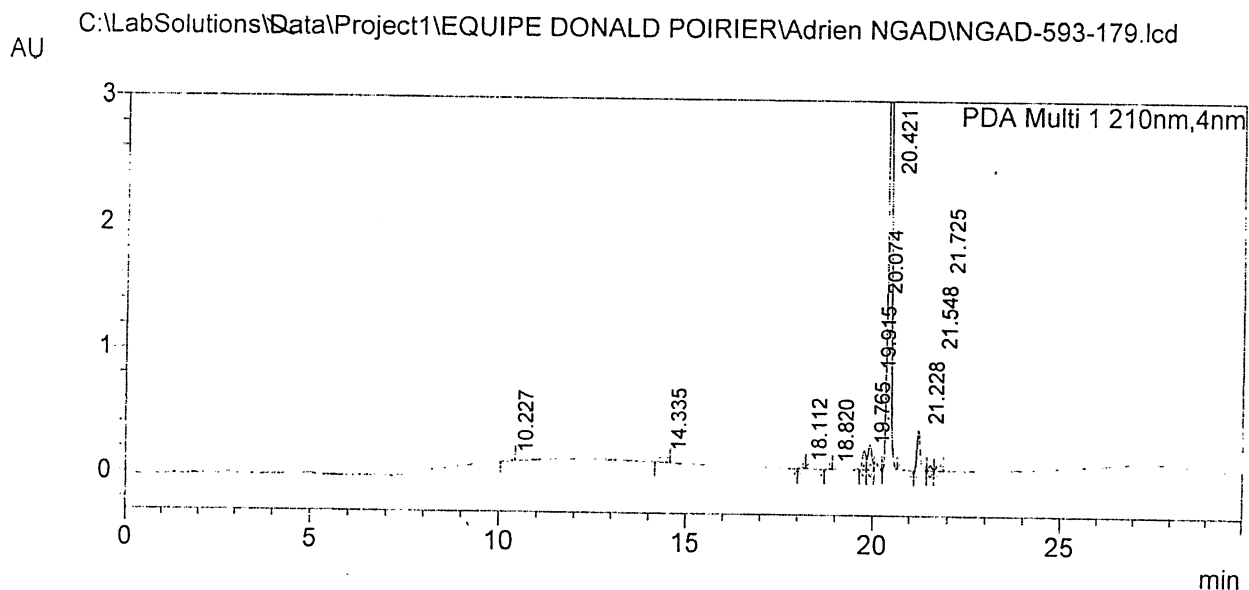

Peak Table

| PDA Ch1 210nm |           |          |         |
|---------------|-----------|----------|---------|
| Peak#         | Ret. Time | Area     | Area%   |
| 1             | 10.227    | 237686   | 0.651   |
| 2             | 14.335    | 407080   | 1.114   |
| 3             | 18.112    | 86464    | 0.237   |
| 4             | 18.820    | 73672    | 0.202   |
| 5             | 19.765    | 958843   | 2.624   |
| 6             | 19.915    | 1440216  | 3.942   |
| 7             | 20.074    | 417695   | 1.143   |
| 8             | 20.421    | 30536866 | 83.574  |
| 9             | 21.228    | 1994418  | 5.458   |
| 10            | 21.548    | 227803   | 0.623   |
| 11            | 21.725    | 157776   | 0.432   |
| Total         |           | 36538518 | 100.000 |
